# Supplementary material for: Emulsion Gels as Precursors for Porous Silicones and All-Polymer Composites—A Proof of Concept Based on Siloxane Stabilizers
Source: MDPI journal article supplement (doi:10.3390/gels8060377), 2022-06-14
Supplement: s1 [file s1]

# Emulsion Gels as Precursors for Porous Silicones and All-Polymer Composites - A Proof of Concept Based on Siloxane Stabilizers

Carmen Racles <sup>1,\*</sup>, Adrian Bele <sup>1</sup>, Ana-Lavinia Vasiliu <sup>2</sup> and Liviu Sacarescu <sup>1</sup>

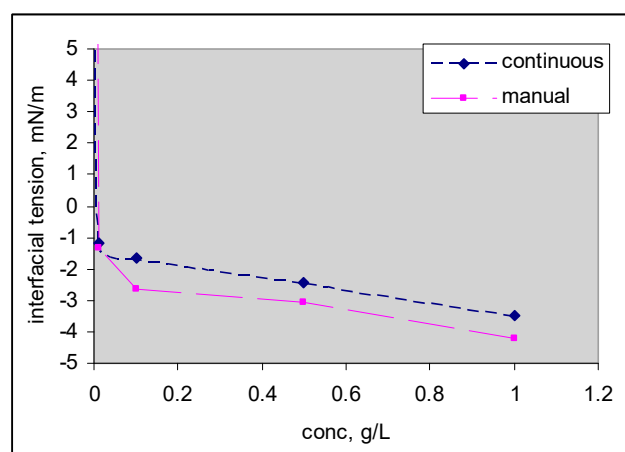

**Figure S1.** Interfacial tension of aqueous solutions of D versus toluene, measured with Wilhelmy plate, in “surface/interfacial tension” (manual) and “continuous Wilhelmy plate” measurement modes.

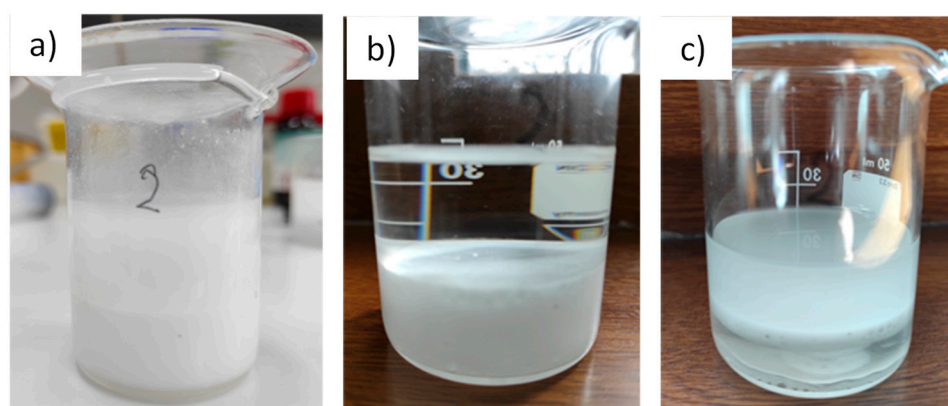

**Figure S2.** Emulsification of 1g/L toluene solution of T with 37.5% water: a) initial aspect of w/o and o/w emulsions after sonication with an Ultrasonic processor (VC 505); b) the aspect of the same sample after 24h of standing (o/w emulsion stabilized); c) result of manual stirring of (b) after one week of standing.

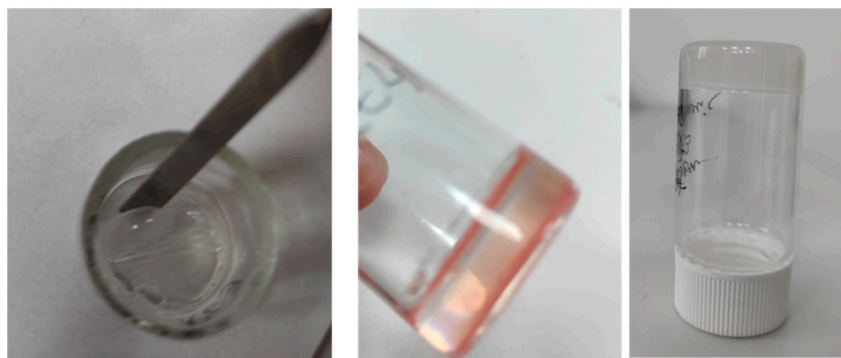

**Figure S3.** Silicone gels obtained from the w/o emulsion, using as continuous phase a polysiloxane toluene solution containing 1g/L surfactant T, and ca. 10% water as internal phase.
